# Supplementary material for: Achieving excellent thermostable red emission in singly Mn2+-doped near-zero thermal expansion (NZTE) material Li2Zn3(P2O7)2
Source: Royal Society of Chemistry journal article supplement (doi:10.1039/d3tc01683h), 2023-01-01
Supplement: d3tc01683h1.pdf [file d3tc01683h1.pdf]

## Electronic Supplementary Information

### **Achieving excellent thermostable red emission in singly Mn<sup>2+</sup>-doped near zero thermal expansion (NZTE) material Li<sub>2</sub>Zn<sub>3</sub>(P<sub>2</sub>O<sub>7</sub>)<sub>2</sub>**

Qin Liu,<sup>a,b,c</sup> Peipei Dang,<sup>\*a</sup> Guodong Zhang,<sup>a,b</sup> Maxim S. Molokeev,<sup>d,e</sup> Sergey P. Polyutov,<sup>d</sup> Hongzhou Lian,<sup>a</sup> Ziyong Cheng,<sup>a</sup> Guogang Li,<sup>\*c,f</sup> Jun Lin<sup>\*a,b</sup>

*<sup>a</sup>State Key Laboratory of Rare Earth Resource Utilization, Changchun Institute of Applied Chemistry, Chinese Academy of Science, Changchun 130022, P. R. China*

*<sup>b</sup>School of Applied Chemistry and Engineering, University of Science and Technology of China, Hefei 230026, P. R. China*

*<sup>c</sup>Faculty of Materials Science and Chemistry, China University of Geoscience, Wuhan 430074, P. R. China*

*<sup>d</sup>International Research Center of Spectroscopy and Quantum Chemistry — IRC SQC, Siberian Federal University, Krasnoyarsk, 660041, Russia*

*<sup>e</sup>Laboratory of Crystal Physics, Kirensky Institute of Physics, Federal Research Center KSC SB RAS, Krasnoyarsk, 660036, Russia*

*<sup>f</sup>Zhejiang Institute, China University of Geosciences, Hangzhou, 311305, P. R. China*

*\*Corresponding Authors: ppdang@ciac.ac.cn; ggli@cug.edu.cn; jlin@ciac.ac.cn*

**Table S1.** Main parameters of processing and refinement for  $\text{Li}_2\text{Zn}_{3-x}(\text{P}_2\text{O}_7)_2:x\text{Mn}^{2+}$  ( $\text{LZPO}:x\text{Mn}^{2+}$ ) samples.

| $x$  | Space Group | Cell parameters ( $\text{\AA}$ ),<br>Cell Volume ( $\text{\AA}^3$ )                        | $R_{\text{wp}}$ , $R_{\text{p}}$ , $R_{\text{B}}$ , $\chi^2$ |
|------|-------------|--------------------------------------------------------------------------------------------|--------------------------------------------------------------|
| 0    | <i>Pbcm</i> | $a = 5.18166(14)$ ,<br>$b = 13.1903(3)$ ,<br>$c = 16.1267(4)$ ,<br>$V = 1102.22(5)$        | 5.34, 4.08, 1.61, 2.5                                        |
| 0.01 | <i>Pbcm</i> | $a = 5.180246(75)$ ,<br>$b = 13.19576(14)$ ,<br>$c = 16.13265(21)$ ,<br>$V = 1102.784(24)$ | 5.63, 4.14, 2.03,<br>2.68                                    |
| 0.1  | <i>Pbcm</i> | $a = 5.18097(18)$ ,<br>$b = 13.1996(4)$ ,<br>$c = 16.1532(5)$ ,<br>$V = 1104.66(6)$        | 5.99, 4.43, 1.53,<br>2.51                                    |
| 0.2  | <i>Pbcm</i> | $a = 5.191046(93)$ ,<br>$b = 13.20336(21)$ ,<br>$c = 16.16339(28)$ ,<br>$V = 1107.827(33)$ | 5.49, 4.23, 0.0, 2.07                                        |
| 0.3  | <i>Pbcm</i> | $a = 5.195002(94)$ ,<br>$b = 13.20857(21)$ ,<br>$c = 16.18377(28)$ ,<br>$V = 1110.507(33)$ | 6.32, 4.89, 0.0, 2.35                                        |

**Table S2.** Fractional atomic coordinates and isotropic displacement parameters ( $\text{\AA}^2$ ) of

LZPO: $x\text{Mn}^{2+}$  samples.

| Atom       | $x$         | $y$         | $z$         | $B_{\text{iso}}$ | $Occ.$ |
|------------|-------------|-------------|-------------|------------------|--------|
| $x = 0$    |             |             |             |                  |        |
| Zn1        | 0.3993(3)   | 0.55199(15) | 0.58356(16) | 1.0(2)           | 1      |
| Zn2        | 1.1524(10)  | 0.7570(4)   | 0.8381(4)   | 0.4(2)           | 0.5    |
| Li1        | 1.232(12)   | 0.779(6)    | 0.846(4)    | 0(2)             | 0.5    |
| Li2        | 0.125(10)   | 0.395(3)    | 0.703(3)    | 1.0(13)          | 0.5    |
| P1         | 0.0895(9)   | 0.3587(3)   | 0.5054(2)   | 0.8(2)           | 1      |
| P2         | 0.5644(13)  | 0.4521(4)   | 0.75        | 0.8(2)           | 1      |
| P3         | 0.6578(12)  | 0.6588(5)   | 0.75        | 0.8(3)           | 1      |
| O1         | 0.3026(14)  | 0.4357(6)   | 0.4982(5)   | 0.2(2)           | 1      |
| O2         | -0.0942(18) | 0.3560(5)   | 0.4318(5)   | 0.2(2)           | 1      |
| O3         | 0.229(2)    | 0.25        | 0.5         | 0.2(2)           | 1      |
| O4         | -0.0526(15) | 0.3651(4)   | 0.5825(6)   | 0.2(2)           | 1      |
| O5         | 0.4032(18)  | 0.4533(7)   | 0.6756(5)   | 0.2(2)           | 1      |
| O6         | 0.7542(19)  | 0.5511(9)   | 0.75        | 0.2(2)           | 1      |
| O7         | 0.4898(15)  | 0.6747(6)   | 0.6746(4)   | 0.2(2)           | 1      |
| O8         | 0.888(2)    | 0.7261(7)   | 0.75        | 0.2(2)           | 1      |
| O9         | 0.2582(19)  | 0.8591(8)   | 0.75        | 0.2(2)           | 1      |
| $x = 0.01$ |             |             |             |                  |        |
| Zn1        | 0.39916(28) | 0.55236(12) | 0.58363(12) | 1.00(13)         | 1      |
| Zn2        | 0.15391(68) | 0.75683(29) | 0.83927(25) | 0.20(15)         | 0.5    |
| Li1        | 0.2520(82)  | 0.7764(35)  | 0.8413(31)  | 0.2(13)          | 0.5    |
| Li2        | 0.0501(80)  | 0.3854(23)  | 0.7073(21)  | 0.20(85)         | 0.5    |
| P1         | 0.08720(68) | 0.35830(22) | 0.50482(18) | 0.63(14)         | 1      |
| P2         | 0.56426(97) | 0.45056(33) | 0.75        | 0.47(16)         | 1      |
| P3         | 0.65483(95) | 0.66205(35) | 0.75        | 0.91(18)         | 1      |
| O1         | 0.3022(12)  | 0.43640(44) | 0.49778(40) | 0.24(13)         | 1      |
| O2         | 0.9015(13)  | 0.35675(39) | 0.43166(40) | 0.24(13)         | 1      |
| O3         | 0.2348(16)  | 0.25        | 0.5         | 0.24(13)         | 1      |
| O4         | 0.9558(12)  | 0.36462(35) | 0.58454(48) | 0.24(13)         | 1      |
| O5         | 0.4036(14)  | 0.44957(50) | 0.67382(39) | 0.24(13)         | 1      |
| O6         | 0.7486(15)  | 0.55276(71) | 0.75        | 0.24(13)         | 1      |
| O7         | 0.4908(12)  | 0.67625(44) | 0.67239(34) | 0.24(13)         | 1      |
| O8         | 0.8824(19)  | 0.72816(56) | 0.75        | 0.24(13)         | 1      |
| O9         | 0.2560(18)  | 0.86302(64) | 0.75        | 0.24(13)         | 1      |
| $x = 0.1$  |             |             |             |                  |        |
| Zn1        | 0.3993(4)   | 0.55181(18) | 0.5833(2)   | 1.0(3)           | 1      |
| Zn2        | 1.1565(9)   | 0.7556(4)   | 0.8375(3)   | 0.2(3)           | 0.5    |
| Li1        | 1.236(11)   | 0.806(5)    | 0.856(4)    | 0.2(18)          | 0.5    |
| Li2        | 0.085(13)   | 0.390(4)    | 0.703(3)    | 0.2(14)          | 0.5    |
| P1         | 0.0888(11)  | 0.3591(3)   | 0.5054(3)   | 0.7(3)           | 1      |
| P2         | 0.5655(16)  | 0.4521(5)   | 0.75        | 1.0(3)           | 1      |
| P3         | 0.6626(15)  | 0.6595(6)   | 0.75        | 0.7(3)           | 1      |
| O1         | 0.3075(18)  | 0.4371(7)   | 0.4995(6)   | 0.2(3)           | 1      |

|                 |             |             |             |          |     |
|-----------------|-------------|-------------|-------------|----------|-----|
| O2              | -0.091(2)   | 0.3528(6)   | 0.4338(6)   | 0.2(3)   | 1   |
| O3              | 0.226(2)    | 0.25        | 0.5         | 0.2(3)   | 1   |
| O4              | -0.0549(19) | 0.3647(5)   | 0.5821(8)   | 0.2(3)   | 1   |
| O5              | 0.406(2)    | 0.4524(8)   | 0.6773(6)   | 0.2(3)   | 1   |
| O6              | 0.756(2)    | 0.5507(11)  | 0.75        | 0.2(3)   | 1   |
| O7              | 0.4921(18)  | 0.6732(7)   | 0.6739(5)   | 0.2(3)   | 1   |
| O8              | 0.889(3)    | 0.7230(9)   | 0.75        | 0.2(3)   | 1   |
| O9              | 0.259(2)    | 0.8586(9)   | 0.75        | 0.2(3)   | 1   |
| <hr/>           |             |             |             |          |     |
| <i>x</i> = 0.2  |             |             |             |          |     |
| Zn1             | 0.39926(31) | 0.55137(13) | 0.58381(14) | 1.00(21) | 1   |
| Zn2             | 0.14769(89) | 0.75708(42) | 0.83921(32) | 0.20(23) | 0.5 |
| Li1             | 0.235(11)   | 0.7650(55)  | 0.8424(39)  | 0.2(19)  | 0.5 |
| Li2             | 0.2363(82)  | 0.4308(29)  | 0.7014(23)  | 1.0(14)  | 0.5 |
| P1              | 0.08838(75) | 0.35849(25) | 0.50465(19) | 0.43(22) | 1   |
| P2              | 0.5688(12)  | 0.45206(37) | 0.75        | 0.52(23) | 1   |
| P3              | 0.6518(10)  | 0.66121(40) | 0.75        | 0.36(24) | 1   |
| O1              | 0.3027(13)  | 0.43465(52) | 0.49828(43) | 0.20(21) | 1   |
| O2              | 0.9102(15)  | 0.35866(44) | 0.43107(44) | 0.20(21) | 1   |
| O3              | 0.2338(18)  | 0.25        | 0.5         | 0.20(21) | 1   |
| O4              | 0.9575(13)  | 0.36479(39) | 0.58374(51) | 0.20(21) | 1   |
| O5              | 0.4144(16)  | 0.45596(58) | 0.67285(46) | 0.20(21) | 1   |
| O6              | 0.7514(17)  | 0.55119(81) | 0.75        | 0.20(21) | 1   |
| O7              | 0.4872(13)  | 0.67560(53) | 0.67292(38) | 0.20(21) | 1   |
| O8              | 0.8855(20)  | 0.72985(64) | 0.75        | 0.20(21) | 1   |
| O9              | 0.2493(16)  | 0.85422(71) | 0.75        | 0.20(21) | 1   |
| <hr/>           |             |             |             |          |     |
| <i>x</i> = 0.30 |             |             |             |          |     |
| Zn1             | 0.39951(34) | 0.55071(14) | 0.58368(15) | 1.00(21) | 1   |
| Zn2             | 0.1478(11)  | 0.75751(47) | 0.83948(37) | 0.20(24) | 0.5 |
| Li1             | 0.227(12)   | 0.7693(60)  | 0.8443(45)  | 0.2(22)  | 0.5 |
| Li2             | 0.2196(86)  | 0.4256(32)  | 0.7012(26)  | 1.0(15)  | 0.5 |
| P1              | 0.08907(81) | 0.35803(27) | 0.50466(21) | 0.20(23) | 1   |
| P2              | 0.5663(13)  | 0.45126(41) | 0.75        | 0.76(25) | 1   |
| P3              | 0.6537(11)  | 0.66010(43) | 0.75        | 0.61(25) | 1   |
| O1              | 0.2958(14)  | 0.43320(56) | 0.49858(48) | 0.20(21) | 1   |
| O2              | 0.9135(16)  | 0.35626(50) | 0.43281(48) | 0.20(21) | 1   |
| O3              | 0.2324(20)  | 0.25        | 0.5         | 0.20(21) | 1   |
| O4              | 0.9545(15)  | 0.36233(44) | 0.58227(57) | 0.20(21) | 1   |
| O5              | 0.4132(18)  | 0.45273(64) | 0.67374(50) | 0.20(21) | 1   |
| O6              | 0.7460(18)  | 0.54991(89) | 0.75        | 0.20(21) | 1   |
| O7              | 0.4845(15)  | 0.67532(57) | 0.67228(41) | 0.20(21) | 1   |
| O8              | 0.8811(22)  | 0.73398(71) | 0.75        | 0.20(21) | 1   |
| O9              | 0.2455(18)  | 0.85927(80) | 0.75        | 0.20(21) | 1   |

**Table S3.** Main bond lengths (Å) of LZPO:*x*Mn<sup>2+</sup> samples.

| $x = 0$                |            |                        |            |
|------------------------|------------|------------------------|------------|
| Zn1—O1                 | 2.1210(82) | Zn1—O1 <sup>i</sup>    | 2.0373(78) |
| Zn1—O2 <sup>ii</sup>   | 2.0083(85) | Zn1—O5                 | 1.9743(89) |
| Zn1—O7                 | 2.2350(76) | Zn2—O2 <sup>iii</sup>  | 2.1438(94) |
| Zn2—O4 <sup>iv</sup>   | 1.9849(95) | Zn2—O7 <sup>v</sup>    | 2.0680(93) |
| Zn2—O8                 | 2.0153(93) | Zn2—O9 <sup>vi</sup>   | 2.0329(95) |
| Li1—P1 <sup>iv</sup>   | 3.102(65)  | Li1—P2 <sup>vii</sup>  | 2.953(73)  |
| Li1—P3 <sup>vi</sup>   | 3.127(67)  | Li1—O2 <sup>iii</sup>  | 2.365(73)  |
| Li1—O3 <sup>iii</sup>  | 3.467(64)  | Li1—O4 <sup>iv</sup>   | 1.866(70)  |
| Li1—O5 <sup>vii</sup>  | 2.996(73)  | Li1—O7 <sup>vi</sup>   | 3.364(67)  |
| Li1—O7 <sup>v</sup>    | 1.946(71)  | Li1—O8                 | 2.461(65)  |
| Li1—O9 <sup>vi</sup>   | 1.879(69)  | Li2—P1                 | 3.227(48)  |
| Li2—P2 <sup>viii</sup> | 3.095(51)  | Li2—P2                 | 2.515(50)  |
| Li2—P3 <sup>ix</sup>   | 3.398(42)  | Li2—O1                 | 3.470(49)  |
| Li2—O4                 | 2.186(49)  | Li2—O5                 | 1.692(50)  |
| Li2—O5 <sup>x</sup>    | 2.549(49)  | Li2—O6 <sup>viii</sup> | 2.916(47)  |
| Li2—O8 <sup>ix</sup>   | 2.354(41)  | Li2—O9 <sup>xi</sup>   | 2.177(51)  |
| Li2—O9 <sup>ix</sup>   | 3.318(52)  | P1—O1                  | 1.5047(87) |
| P1—O2                  | 1.5218(94) | P1—O3                  | 1.6080(62) |
| P1—O4                  | 1.4475(99) | P2—O5                  | 1.4620(93) |
| P2—O6                  | 1.634(12)  | P2—O9 <sup>ix</sup>    | 1.532(11)  |
| P3—O6                  | 1.505(13)  | P3—O7                  | 1.5100(78) |
| P3—O8                  | 1.486(11)  |                        |            |
| $x = 0.01$             |            |                        |            |
| Zn1—O1 <sup>xii</sup>  | 2.0347(65) | Zn1—O1 <sup>xiii</sup> | 2.1241(63) |
| Zn1—O2 <sup>xii</sup>  | 1.9811(63) | Zn1—O5 <sup>xiii</sup> | 1.9893(66) |
| Zn1—O7 <sup>xiii</sup> | 2.2245(59) | Zn2—O2 <sup>iii</sup>  | 2.1331(70) |
| Zn2—O4 <sup>iv</sup>   | 1.9639(72) | Zn2—O7 <sup>x</sup>    | 2.0522(70) |
| Zn2—O8 <sup>xiv</sup>  | 2.0482(78) | Zn2—O9 <sup>x</sup>    | 2.0778(73) |
| Li1—P1 <sup>xv</sup>   | 3.227(47)  | Li1—P2 <sup>iv</sup>   | 2.890(46)  |
| Li1—P3 <sup>x</sup>    | 2.966(45)  | Li1—O2 <sup>iii</sup>  | 2.417(47)  |
| Li1—O4 <sup>iv</sup>   | 1.986(47)  | Li1—O5 <sup>iv</sup>   | 2.909(45)  |
| Li1—O7 <sup>x</sup>    | 1.823(44)  | Li1—O7 <sup>xiii</sup> | 3.271(48)  |
| Li1—O8 <sup>xiv</sup>  | 2.498(46)  | Li1—O9 <sup>x</sup>    | 1.864(48)  |
| Li2—P1 <sup>xiii</sup> | 3.291(33)  | Li2—P2 <sup>xiv</sup>  | 2.747(40)  |
| Li2—P2 <sup>x</sup>    | 2.882(40)  | Li2—P3 <sup>ix</sup>   | 3.390(33)  |
| Li2—O4 <sup>xiv</sup>  | 3.404(34)  | Li2—O4 <sup>xvi</sup>  | 2.058(35)  |
| Li2—O5 <sup>x</sup>    | 2.783(37)  | Li2—O5 <sup>xvi</sup>  | 3.496(41)  |
| Li2—O5 <sup>xiii</sup> | 2.088(39)  | Li2—O6 <sup>xiv</sup>  | 2.791(35)  |
| Li2—O8 <sup>ix</sup>   | 2.214(31)  | Li2—O9 <sup>xi</sup>   | 1.753(40)  |
| P1—O1 <sup>xiii</sup>  | 1.5216(68) | P1—O2 <sup>xvi</sup>   | 1.5227(72) |
| P1—O3 <sup>xvii</sup>  | 1.6226(49) | P1—O4 <sup>xvi</sup>   | 1.4575(80) |
| P2—O5 <sup>x</sup>     | 1.4843(71) | P2—O6 <sup>x</sup>     | 1.6524(99) |
| P2—O9 <sup>ix</sup>    | 1.4836(99) | P3—O6 <sup>x</sup>     | 1.521(10)  |
| P3—O7 <sup>x</sup>     | 1.5247(63) | P3—O8 <sup>x</sup>     | 1.466(10)  |

|                        |            |                        |            |
|------------------------|------------|------------------------|------------|
| $x = 0.1$              |            |                        |            |
| Zn1—O1                 | 2.0859(98) | Zn1—O1 <sup>i</sup>    | 2.0292(98) |
| Zn1—O2 <sup>ii</sup>   | 2.0525(97) | Zn1—O5                 | 2.007(10)  |
| Zn1—O7                 | 2.2226(91) | Zn2—O2 <sup>iii</sup>  | 2.140(10)  |
| Zn2—O4 <sup>iv</sup>   | 2.009(11)  | Zn2—O7 <sup>v</sup>    | 2.059(10)  |
| Zn2—O8                 | 2.025(11)  | Zn2—O9 <sup>vi</sup>   | 2.0317(97) |
| Li1—P1 <sup>iv</sup>   | 2.887(62)  | Li1—P2 <sup>vii</sup>  | 2.776(64)  |
| Li1—P3 <sup>vi</sup>   | 3.399(62)  | Li1—O2 <sup>iii</sup>  | 2.556(65)  |
| Li1—O3 <sup>iii</sup>  | 3.418(61)  | Li1—O4 <sup>iv</sup>   | 1.574(63)  |
| Li1—O5 <sup>vii</sup>  | 2.732(62)  | Li1—O7 <sup>v</sup>    | 2.250(63)  |
| Li1—O8                 | 2.713(62)  | Li1—O9 <sup>vi</sup>   | 1.851(64)  |
| Li2—P1                 | 3.217(48)  | Li2—P2 <sup>viii</sup> | 2.914(65)  |
| Li2—P2                 | 2.728(65)  | Li2—P3 <sup>ix</sup>   | 3.397(55)  |
| Li2—O4                 | 2.109(52)  | Li2—O5                 | 1.901(64)  |
| Li2—O5 <sup>x</sup>    | 2.680(57)  | Li2—O6 <sup>viii</sup> | 2.825(59)  |
| Li2—O8 <sup>ix</sup>   | 2.335(53)  | Li2—O9 <sup>xi</sup>   | 1.981(65)  |
| P1—O1                  | 1.533(10)  | P1—O2                  | 1.487(11)  |
| P1—O3                  | 1.6083(63) | P1—O4                  | 1.447(13)  |
| P2—O5                  | 1.435(11)  | P2—O6                  | 1.633(15)  |
| P2—O9 <sup>ix</sup>    | 1.532(13)  | P3—O6                  | 1.515(16)  |
| P3—O7                  | 1.5245(96) | P3—O8                  | 1.441(16)  |
| $x = 0.2$              |            |                        |            |
| Zn1—O1 <sup>xii</sup>  | 2.0465(70) | Zn1—O1 <sup>xiii</sup> | 2.1301(71) |
| Zn1—O2 <sup>xii</sup>  | 2.0123(73) | Zn1—O5 <sup>xiii</sup> | 1.9142(78) |
| Zn1—O7 <sup>xiii</sup> | 2.2301(69) | Zn2—O2 <sup>iii</sup>  | 2.1517(84) |
| Zn2—O4 <sup>iv</sup>   | 1.9676(85) | Zn2—O7 <sup>x</sup>    | 2.0741(83) |
| Zn2—O8 <sup>xiv</sup>  | 2.0151(87) | Zn2—O9 <sup>x</sup>    | 2.0005(83) |
| Li1—P1 <sup>xv</sup>   | 3.233(63)  | Li1—P2 <sup>iv</sup>   | 3.060(68)  |
| Li1—P3 <sup>x</sup>    | 2.964(62)  | Li1—O2 <sup>iii</sup>  | 2.299(67)  |
| Li1—O4 <sup>iv</sup>   | 2.039(66)  | Li1—O5 <sup>iv</sup>   | 3.119(68)  |
| Li1—O7 <sup>x</sup>    | 1.780(64)  | Li1—O7 <sup>xiii</sup> | 3.257(63)  |
| Li1—O8 <sup>xiv</sup>  | 2.395(60)  | Li1—O9 <sup>x</sup>    | 1.903(67)  |
| Li2—P1 <sup>xiii</sup> | 3.408(37)  | Li2—P2 <sup>x</sup>    | 1.917(42)  |
| Li2—O1 <sup>xiii</sup> | 3.301(37)  | Li2—O4 <sup>xvi</sup>  | 2.543(39)  |
| Li2—O5 <sup>x</sup>    | 2.257(38)  | Li2—O5 <sup>xiii</sup> | 1.085(42)  |
| Li2—O6 <sup>xiv</sup>  | 3.078(42)  | Li2—O6 <sup>x</sup>    | 3.208(42)  |
| Li2—O8 <sup>ix</sup>   | 2.838(39)  | Li2—O9 <sup>xi</sup>   | 2.827(42)  |
| Li2—O9 <sup>ix</sup>   | 2.961(42)  | P1—O1 <sup>xiii</sup>  | 1.5031(77) |
| P1—O2 <sup>xvi</sup>   | 1.5066(81) | P1—O3 <sup>xvii</sup>  | 1.6209(55) |
| P1—O4 <sup>xvi</sup>   | 1.4500(85) | P2—O5 <sup>x</sup>     | 1.4832(84) |
| P2—O6 <sup>x</sup>     | 1.616(11)  | P2—O9 <sup>ix</sup>    | 1.600(10)  |
| P3—O6 <sup>x</sup>     | 1.541(11)  | P3—O7 <sup>x</sup>     | 1.5226(70) |
| P3—O8 <sup>x</sup>     | 1.514(11)  |                        |            |
| $x = 0.3$              |            |                        |            |
| Zn1—O1 <sup>xii</sup>  | 2.0791(77) | Zn1—O1 <sup>xiii</sup> | 2.1438(78) |
| Zn1—O2 <sup>xii</sup>  | 2.0555(79) | Zn1—O5 <sup>xiii</sup> | 1.9504(85) |

|                         |            |                        |            |
|-------------------------|------------|------------------------|------------|
| Zn1—O7 <sup>xiii</sup>  | 2.2271(74) | Zn2—O2 <sup>iii</sup>  | 2.1543(94) |
| Zn2—O4 <sup>iv</sup>    | 1.9501(97) | Zn2—O7 <sup>x</sup>    | 2.0674(96) |
| Zn2—O8 <sup>xiv</sup>   | 2.0281(98) | Zn2—O9 <sup>x</sup>    | 2.0399(95) |
| Li1—P1 <sup>xv</sup>    | 3.169(71)  | Li1—P2 <sup>iv</sup>   | 3.042(75)  |
| Li1—P3 <sup>x</sup>     | 3.053(69)  | Li1—O2 <sup>iii</sup>  | 2.309(75)  |
| Li1—O3 <sup>xviii</sup> | 3.479(68)  | Li1—O4 <sup>iv</sup>   | 1.952(73)  |
| Li1—O5 <sup>iv</sup>    | 3.073(73)  | Li1—O7 <sup>x</sup>    | 1.844(71)  |
| Li1—O7 <sup>xiii</sup>  | 3.328(72)  | Li1—O8 <sup>xiv</sup>  | 2.403(68)  |
| Li1—O9 <sup>x</sup>     | 1.936(75)  | Li2—P1 <sup>xiii</sup> | 3.372(42)  |
| Li2—P2 <sup>x</sup>     | 1.995(44)  | Li2—O1 <sup>xiii</sup> | 3.304(42)  |
| Li2—O4 <sup>xvi</sup>   | 2.509(43)  | Li2—O5 <sup>x</sup>    | 2.288(43)  |
| Li2—O5 <sup>xiii</sup>  | 1.156(45)  | Li2—O6 <sup>xiv</sup>  | 3.061(44)  |
| Li2—O6 <sup>x</sup>     | 3.286(45)  | Li2—O8 <sup>ix</sup>   | 2.702(43)  |
| Li2—O9 <sup>xi</sup>    | 2.688(45)  | Li2—O9 <sup>ix</sup>   | 3.018(45)  |
| P1—O1 <sup>xiii</sup>   | 1.4659(83) | P1—O2 <sup>xvi</sup>   | 1.4780(88) |
| P1—O3 <sup>xvii</sup>   | 1.6112(60) | P1—O4 <sup>xvi</sup>   | 1.4385(96) |
| P2—O5 <sup>x</sup>      | 1.4683(92) | P2—O6 <sup>x</sup>     | 1.602(12)  |
| P2—O9 <sup>ix</sup>     | 1.559(11)  | P3—O6 <sup>x</sup>     | 1.532(12)  |
| P3—O7 <sup>x</sup>      | 1.5476(77) | P3—O8 <sup>x</sup>     | 1.532(12)  |

Symmetry codes: (i)  $-x+1, -y+1, -z+1$ ; (ii)  $-x, -y+1, -z+1$ ; (iii)  $-x+1, -y+1, z+1/2$ ; (iv)  $-x+1, y+1/2, -z+3/2$ ; (v)  $x+1, y, -z+3/2$ ; (vi)  $x+1, y, z$ ; (vii)  $-x+2, y+1/2, -z+3/2$ ; (viii)  $x-1, y, z$ ; (ix)  $-x+1, y+1/2, -z+3/2$ ; (x)  $x, y, -z+3/2$ ; (xi)  $-x, y+1/2, -z+3/2$ ; (xii)  $x+1, y+1, z+1$ ; (xiii)  $-x, -y, -z$ ; (xiv)  $x-1, y, -z+3/2$ ; (xv)  $-x, y+1/2, -z+3/2$ ; (xvi)  $-x-1, -y, -z$ ; (xvii)  $x, -y+1/2, -z+1$ ; (xviii)  $-x, -y+1, z+1/2$ .

**Table S4.** The emission peak position and corresponding lifetime of LZPO: $x\text{Mn}^{2+}$  ( $x = 0.01-0.5$ ) samples fitted by a second-order exponential function.

| $x$  | Emission peak position (nm) | Fitting constants |          | Lifetime (ms) |          |        |
|------|-----------------------------|-------------------|----------|---------------|----------|--------|
|      | P                           | A1                | A2       | $\tau_1$      | $\tau_2$ | $\tau$ |
| 0.01 | 636                         | 518.8144          | 2922.971 | 20.29         | 41.72    | 40.02  |
| 0.05 | 642                         | 589.1242          | 4111.909 | 11.80         | 39.60    | 38.46  |
| 0.1  | 651                         | 913.6996          | 3859.072 | 11.11         | 37.80    | 36.07  |
| 0.2  | 666                         | 1685.376          | 3397.359 | 9.77          | 32.13    | 29.19  |
| 0.3  | 672                         | 1787.116          | 3334.888 | 8.20          | 26.60    | 23.99  |
| 0.5  | 672                         | 2215.139          | 2926.589 | 4.76          | 18.35    | 16.12  |



**Table S5.** The emission peak position fitted by Gaussian method and corresponding lifetime of LZPO: $x$ Mn<sup>2+</sup> samples.

---

| $x$  | Emission peak position (nm) |     |     | Lifetime (ms) |             |             |
|------|-----------------------------|-----|-----|---------------|-------------|-------------|
|      | P                           | P1  | P2  | $\tau_p$      | $\tau_{P1}$ | $\tau_{P2}$ |
| 0.01 | 636                         | 628 | 680 | 40.02         | 40.13       | 38.73       |
| 0.05 | 642                         | 633 | 684 | 38.46         | 38.39       | 37.96       |
| 0.1  | 651                         | 642 | 688 | 36.07         | 36.57       | 36.58       |
| 0.2  | 666                         | 654 | 698 | 29.19         | 28.90       | 29.61       |
| 0.3  | 672                         | 654 | 700 | 23.99         | 23.86       | 24.59       |
| 0.5  | 672                         | 654 | 700 | 16.12         | 16.01       | 16.63       |

---

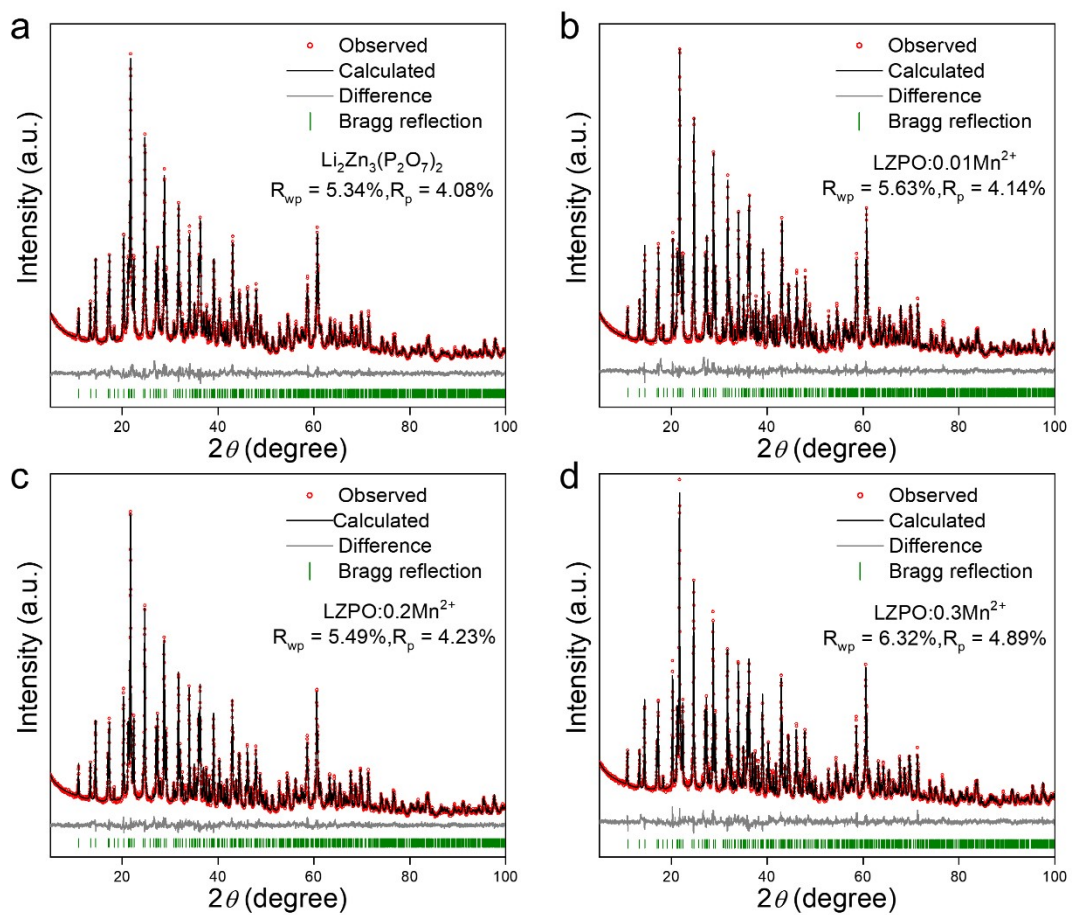

**Fig. S1.** The Rietveld refinement XRD pattern for (a) LZPO host sample, (b) LZPO:0.01 $\text{Mn}^{2+}$ , (c) LZPO:0.2 $\text{Mn}^{2+}$ , (d) LZPO:0.3 $\text{Mn}^{2+}$ .

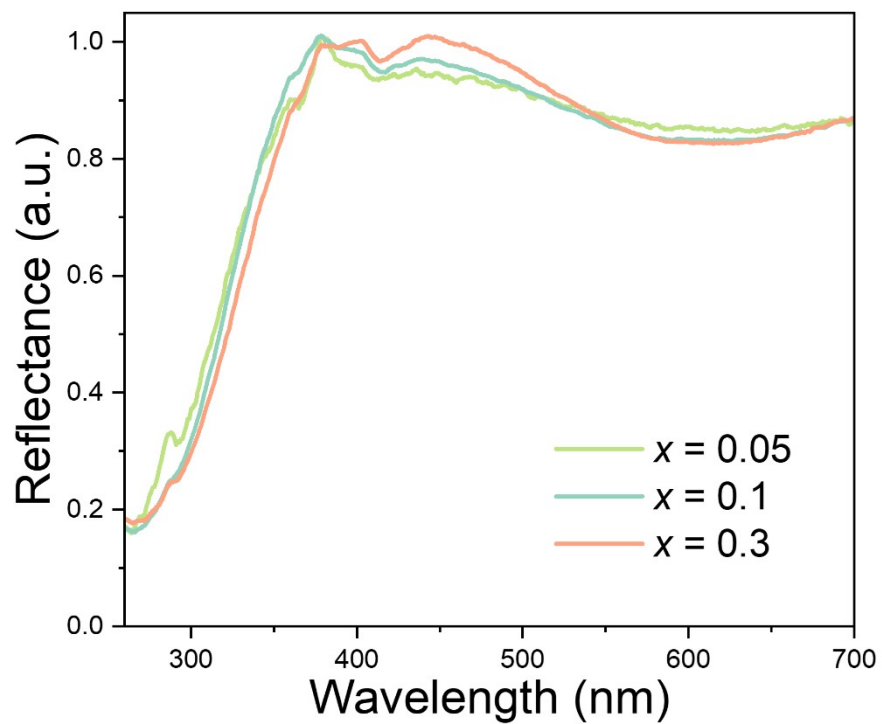

**Fig. S2.** The diffuse reflectance spectra of LZPO: $x\text{Mn}^{2+}$  ( $x = 0.05, 0.1, 0.3$ ) phosphors.

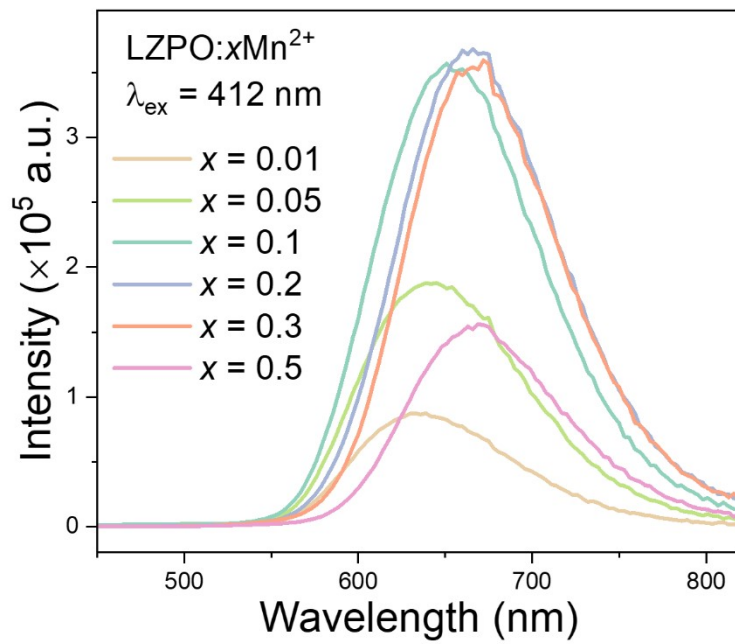

**Fig. S3.** PL spectra of LZPO: $x\text{Mn}^{2+}$  ( $x = 0.01-0.5$ ) under 412 nm wavelength excitation.

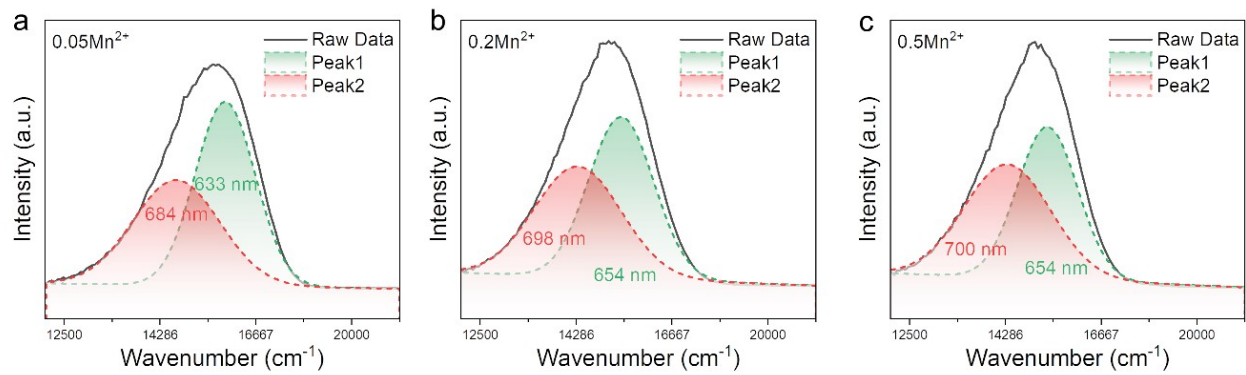

**Fig. S4.** The Gaussian fitting of (a) LZPO:0.05Mn<sup>2+</sup>, (b) LZPO:0.2Mn<sup>2+</sup> and (c) LZPO:0.5Mn<sup>2+</sup>.

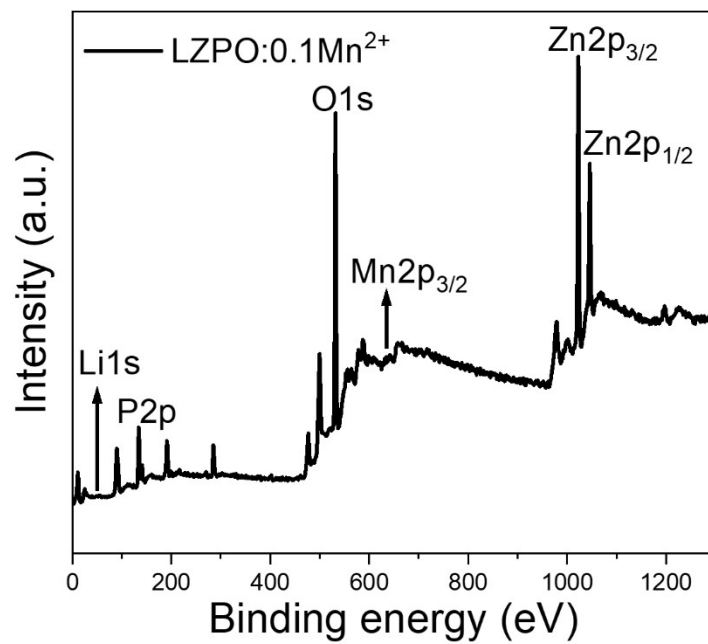

**Fig. S5.** XPS spectrum of representative LZPO:0.1Mn<sup>2+</sup>.

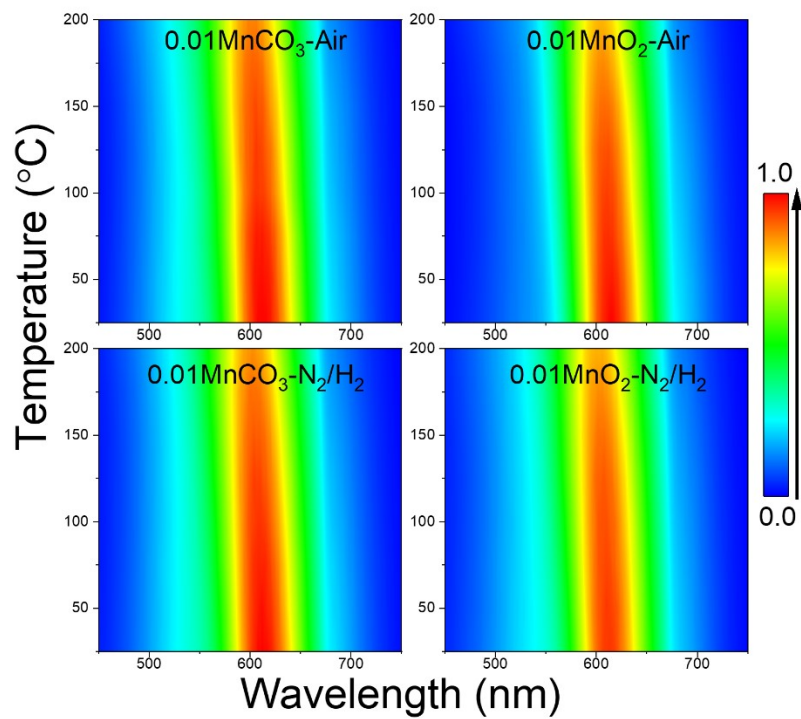

**Fig. S6.** Temperature-dependent PL spectra of LZPO:0.01Mn<sup>2+</sup> with different Mn-source sintered in air and N<sub>2</sub>(90%)-H<sub>2</sub>(10%) atmosphere.
